# Supplementary material for: Multi-Acting Mitochondria-Targeted Platinum(IV) Prodrugs of Kiteplatin with α-Lipoic Acid in the Axial Positions
Source: PubMed Central journal article supplement (PMC6073472; doi:10.3390/ijms19072050), 2018-07-14
Supplement: ijms-19-02050-s001.pdf [file ijms-19-02050-s001.pdf]

## Supplementary Information

# Multi-Acting Mitochondria-Targeted Platinum(IV) Prodrugs of Kiteplatin with $\alpha$ -Lipoic acid in the Axial Positions

Salvatore Savino,<sup>1</sup> Cristina Marzano,<sup>2</sup> Valentina Gandin,<sup>2</sup> James D. Hoeschele,<sup>3</sup> Giovanni Natile,<sup>1,\*</sup> Nicola Margiotta.<sup>1,\*</sup>

<sup>1</sup>Department of Chemistry, University of Bari Aldo Moro, Via E. Orabona 4, 70125, Bari (Italy);

<sup>2</sup>Department of Pharmaceutical and Pharmacological Sciences, University of Padua, Via Marzolo 5, 35131, Padova (Italy);

<sup>3</sup>Department of Chemistry, Eastern Michigan University, 48197 Ypsilanti, MI (USA).

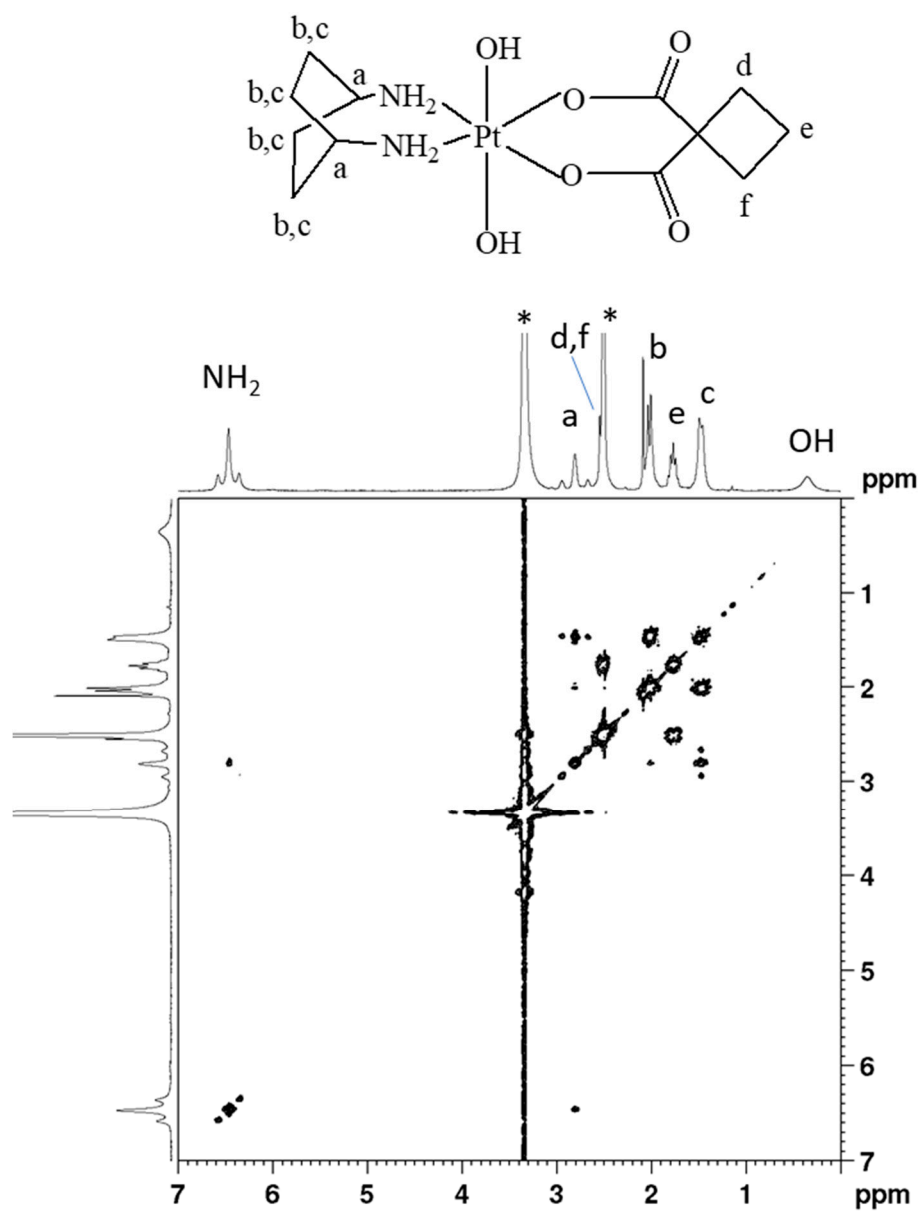

**Figure S1.** Selected region of the 2D COSY (700 MHz) spectrum obtained for *cis,trans,cis*-[Pt(CBDCA)(OH)<sub>2</sub>(*cis*-1,4-DACH)] (1) in DMSO-d<sub>6</sub>. The asterisks indicate the residual solvent peak.

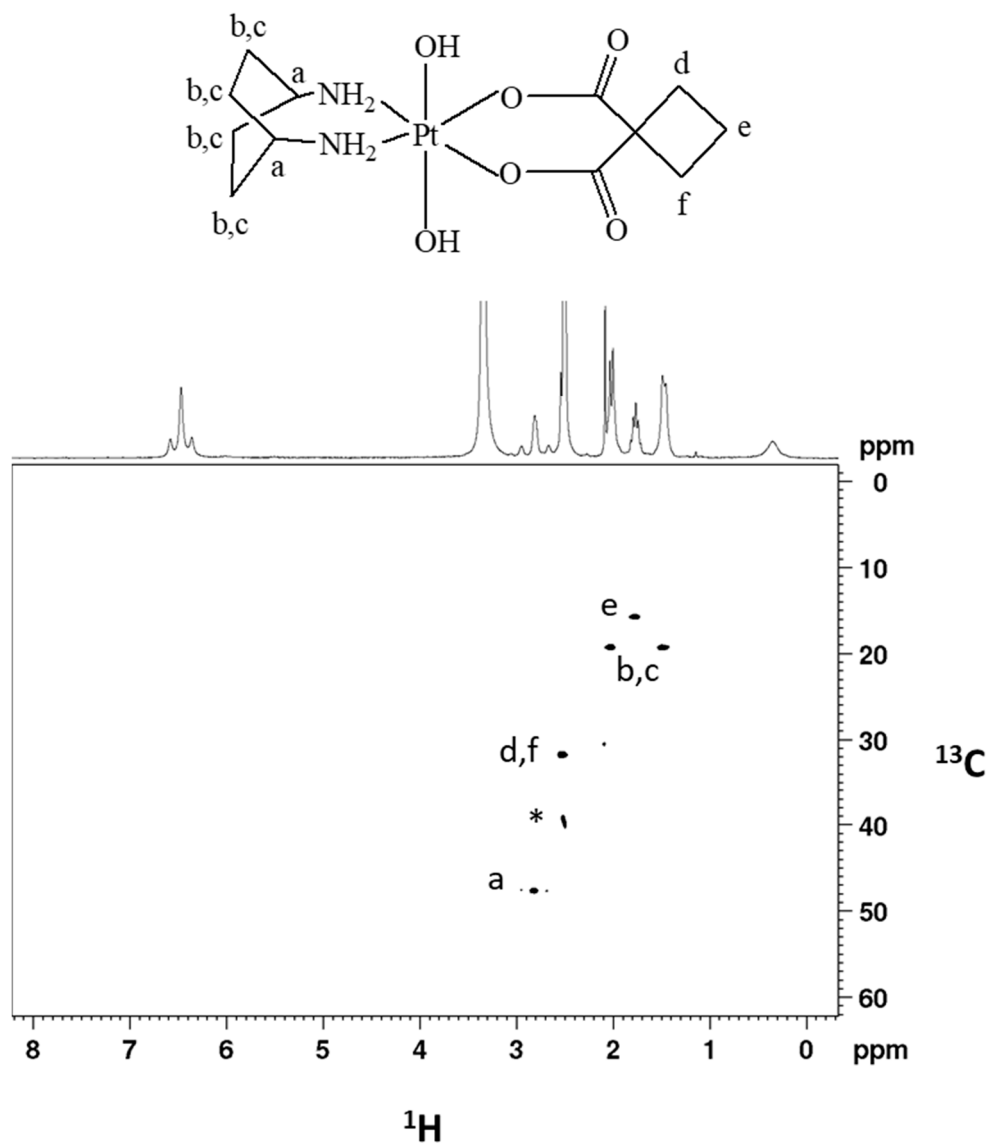

**Figure S2.** [ $^1\text{H}$ ,  $^{13}\text{C}$ ] HSQC ( $^1\text{H}$  700 MHz) of *cis,trans,cis*-[Pt(CBDCA)(OH) $_2$ (*cis*-1,4-DACH)] (1) in DMSO- $d_6$ . The asterisk indicates the residual solvent peak.

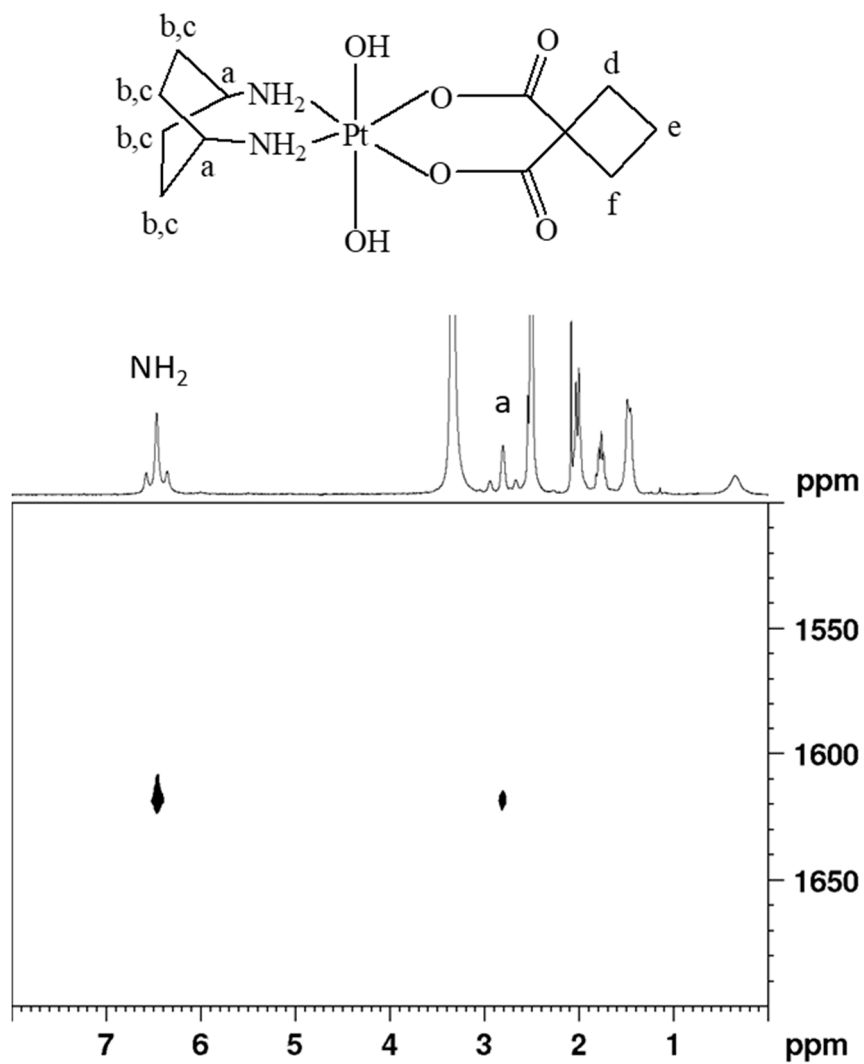

**Figure S3.** [<sup>1</sup>H-<sup>195</sup>Pt]-HSQC 2D spectrum (<sup>1</sup>H 300 MHz) obtained for *cis,trans,cis*-[Pt(CBDCA)(OH)<sub>2</sub>(*cis*-1,4-DACH)] (**1**) in DMSO-d<sub>6</sub>.

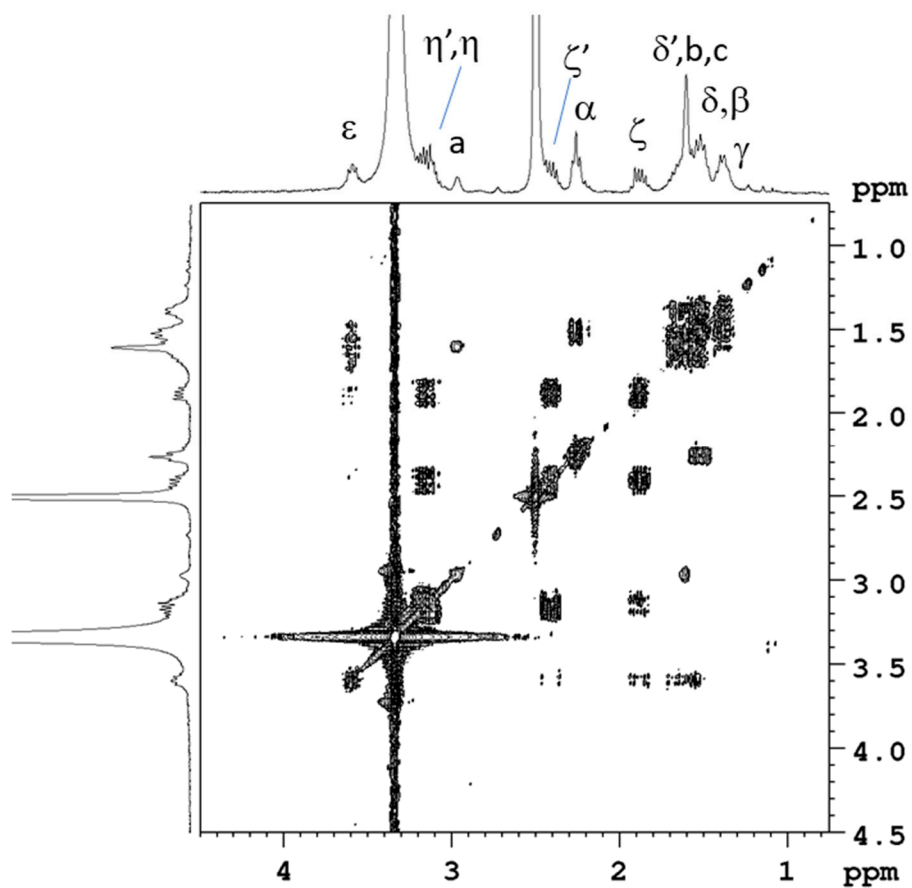

**Figure S4.** Selected region of the 2D COSY (700 MHz) spectrum obtained for *cis,trans,cis*-[PtCl<sub>2</sub>(ALA)<sub>2</sub>(*cis*-1,4-DACH)] (3) in DMSO-d<sub>6</sub>. Numbering of protons is reported in Scheme 3.

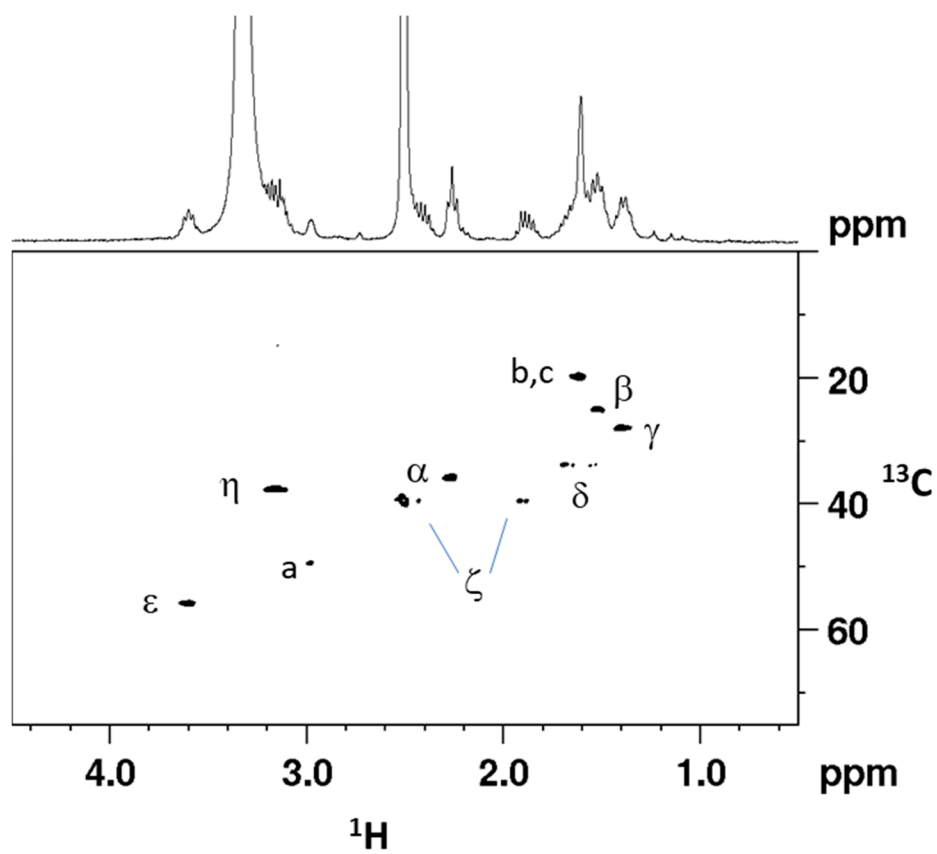

**Figure S5.** [ $^1\text{H}$ ,  $^{13}\text{C}$ ] HSQC ( $^1\text{H}$  700 MHz) of *cis,trans,cis*-[PtCl<sub>2</sub>(ALA)<sub>2</sub>(*cis*-1,4-DACH)] (3) in DMSO-*d*<sub>6</sub>. Numbering of protons is reported in Scheme 3.

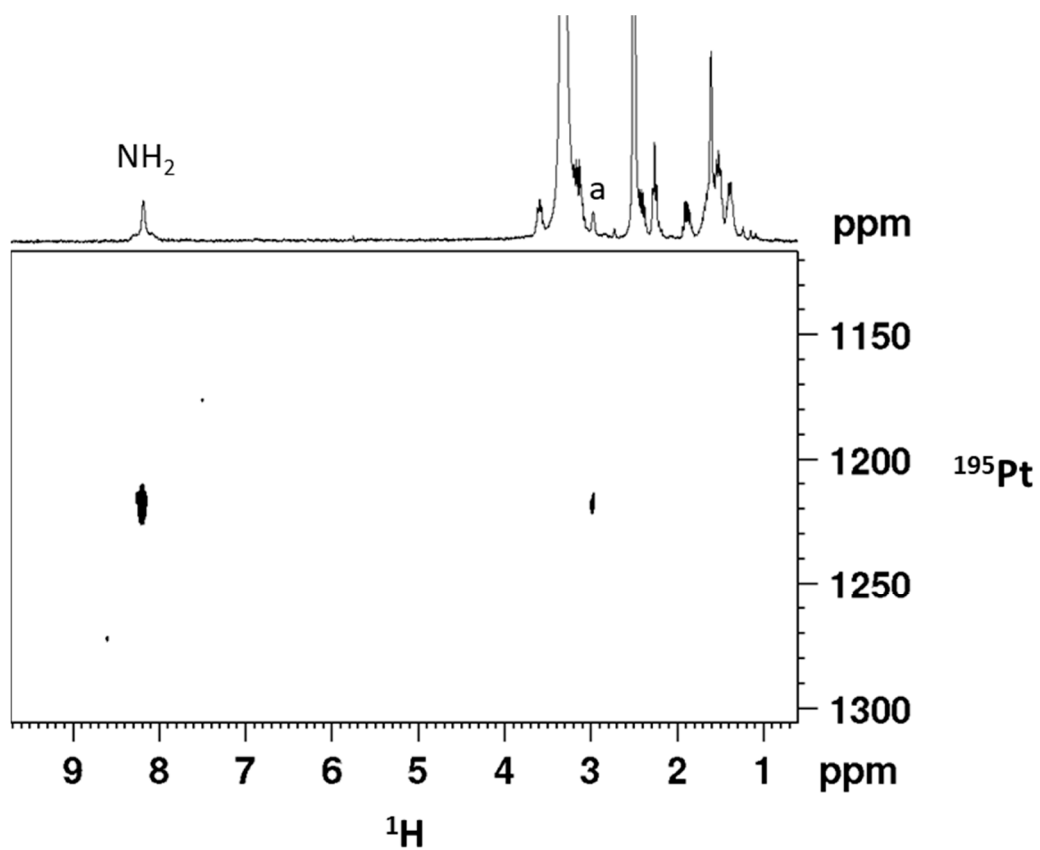

**Figure S6.** [ $^1\text{H}$ - $^{195}\text{Pt}$ ]-HSQC 2D spectrum ( $^1\text{H}$  300 MHz) obtained for *cis,trans,cis*-[PtCl<sub>2</sub>(ALA)<sub>2</sub>(*cis*-1,4-DACH)] (**3**) in DMSO-d<sub>6</sub>. Numbering of protons is reported in Scheme 3.
